# Supplementary material
Source: PubMed Central journal article supplement (PMC3033806)
Supplement: NIHMS266969-supplement-01.pdf [file NIHMS266969-supplement-01.pdf]

## **Supplementary Information**

### **Construction of a genetic multiplexer to toggle between chemosensory pathways in *Escherichia coli***

**Tae Seok Moon, Elizabeth J. Clarke, Eli S. Groban, Alvin Tamsir, Ryan M. Clark, Matthew Eames, Tanja Kortemme, and Christopher A. Voigt**

|                                                  | <b>page</b> |
|--------------------------------------------------|-------------|
| <b>1. Chemotaxis Assay Protocol</b>              | <b>2</b>    |
| <b>2. Supplementary Figures</b>                  | <b>5</b>    |
| <b>3. Image Analysis Algorithm (MATLAB Code)</b> | <b>8</b>    |
| <b>4. Sequence Alignment</b>                     | <b>10</b>   |

## 1. Chemotaxis Assay Protocol

This assay was developed by Goulian and co-workers (Derr *et al*, 2006). Here, we present an easy-to-follow protocol with minor modifications. We provide the manufacturer and model name for all equipment, although it may not be critical.

### Equipment and materials

- 37°C incubator shaker (Innova® 44, New Brunswick Scientific, Edison, NJ)
- 30°C and 37°C static incubator (Isotemp Incubator, Fisher Scientific, Pittsburgh, PA)
- 4°C refrigerator
- square integrid Petri dishes (90 mm x 90 mm, PETRIDISH SQ ST CS300, BD Biosciences, San Jose, CA)
- Alphamager® (Cell Biosciences, Santa Clara, CA) or other equipment with camera
- spectrophotometer (50 Bio, Varian, Palo Alto, CA)
- culture tubes (Falcon® 14 mL Polypropylene Round-Bottom Tube, BD Biosciences, San Jose, CA)
- centrifuge (Allegra™ X-12R Centrifuge, Beckman Coulter, Brea, CA)
  
- 34 mg/mL chloramphenicol (in ethanol, Acros Organics, Morris Plains, NJ)
- 10 mM L-aspartate (sterilized by filtration, Sigma Aldrich, St. Louis, MO)
- 10 mM L-serine (sterilized by filtration, Sigma Aldrich, St. Louis, MO)
- 1 M arabinose (sterilized by filtration, Sigma Aldrich, St. Louis, MO)
- 20% (w/v) glucose (sterilized by filtration, Fisher Scientific, Pittsburgh, PA)
- LB (Miller, BD Biosciences, San Jose, CA)
- agar (Bacto Agar, BD Biosciences, San Jose, CA)
- LB/Cm agar plates (LB + 34 µg/mL chloramphenicol)
  
- 5x minA salts (per 1L, pH7.4, autoclaved)
  - 5g (NH<sub>4</sub>)<sub>2</sub>SO<sub>4</sub> (Fisher Scientific, Pittsburgh, PA)
  - 22.5g KH<sub>2</sub>PO<sub>4</sub> (Fisher Scientific, Pittsburgh, PA)
  - 52.5g K<sub>2</sub>HPO<sub>4</sub> (Fisher Scientific, Pittsburgh, PA)
  - 2.5g sodium citrate•2H<sub>2</sub>O (Fisher Scientific, Pittsburgh, PA)
  
- 1 M MgSO<sub>4</sub> (sterilized by filtration, Fisher Scientific, Pittsburgh, PA)
- 0.1 M CaCl<sub>2</sub> (sterilized by filtration, Fisher Scientific, Pittsburgh, PA)
- 1M ZnSO<sub>4</sub> (sterilized by filtration, Fisher Scientific, Pittsburgh, PA)
- 10% (v/v) glycerol (sterilized by filtration, Fisher Scientific, Pittsburgh, PA)
- 10 mg/mL methionine (pH7, sterilized by filtration, Sigma Aldrich, St. Louis, MO)
- 10 mg/mL histidine (pH7, sterilized by filtration, Acros Organics, Morris Plains, NJ)
- 10 mg/mL leucine (pH7, sterilized by filtration, Acros Organics, Morris Plains, NJ)
- 10 mg/mL threonine (pH7, sterilized by filtration, Acros Organics, Morris Plains, NJ)
  
- minAaa medium (per 500 mL)
  - Mix the following:
    - 86.9 mL 5x minA salts
    - 100 mL 10 mg/mL methionine (pH7)
    - 100 mL 10 mg/mL histidine (pH7)

100 mL 10 mg/mL leucine (pH7)  
100 mL 10 mg/mL threonine (pH7)  
Add while stirring:  
0.5 mL 1 M MgSO<sub>4</sub>  
2.5 mL 0.1 M CaCl<sub>2</sub>  
0.1 mL 1 M ZnSO<sub>4</sub>  
10 mL 10% (v/v) glycerol

■ minAaa semisolid agar medium (per 500 mL)

Mix and autoclave the following:

86.9 mL 5x minA salts  
1.5g agar

Add while stirring:

100 mL 10 mg/mL methionine (pH7)  
100 mL 10 mg/mL histidine (pH7)  
100 mL 10 mg/mL leucine (pH7)  
100 mL 10 mg/mL threonine (pH7)  
0.5 mL 1 M MgSO<sub>4</sub>  
2.5 mL 0.1 M CaCl<sub>2</sub>  
0.1 mL 1 M ZnSO<sub>4</sub>  
10 mL 10% (v/v) glycerol  
0.5 mL 34 mg/mL chloramphenicol

Pour the mixture into square integrid Petri dishes before it solidifies, and store them in a refrigerator.

**Materials that should be freshly prepared**

■ Media for step 2

1.95 mL of minAaa media  
2 µL of 34 mg/mL chloramphenicol  
50 µL of 20% (w/v) glucose

■ Media for step 4

tube A  
8 mL of minAaa media  
8 µL of 34 mg/mL chloramphenicol  
tube B  
7.8 mL of minAaa media  
8 µL of 34 mg/mL chloramphenicol  
200 µL of 20% (w/v) glucose

■ Washing solution for step 8 and 9

5 mL of minAaa media  
5 µL of 34 mg/mL chloramphenicol

■ Preparation of culture with OD<sub>600</sub> = 0.2 (the measured OD<sub>600</sub> = X) for step 9

2 – 0.4/X mL of minAaa media  
2 – 0.4/X µL of 34 mg/mL chloramphenicol  
0.4/X mL of the resuspended cells

## Procedure

**Timeline (The numbers indicate those in the procedure below.)**

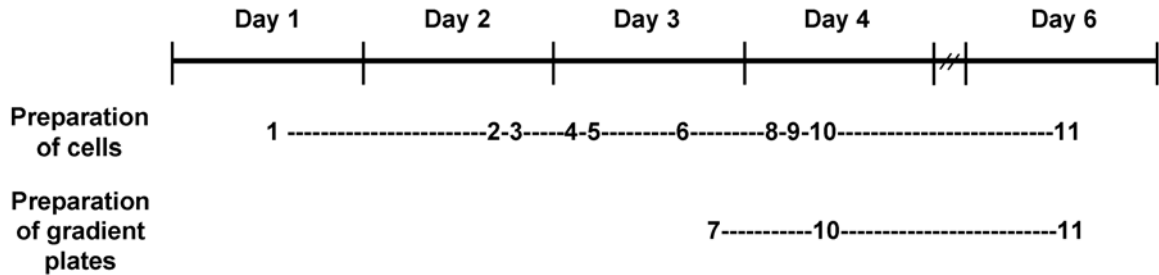

### Day 1

1. Transform the knockout strain CAV8 (BW28357 with the eight chromosomal genes deleted) with pChemoK and incubate on LB/Cm agar plates overnight.

### Day 2

2. Inoculate a freshly transformed colony from the plate in step 1 into a Falcon® 14 mL tube containing 2 mL minAaa media supplemented with 34 µg/mL chloramphenicol and 0.5% (w/v) glucose.
3. Grow at 37°C and 250 rpm to  $OD_{600} = 3$ .

### Day 3

4. Transfer 80 µL of the culture from step 3 into two different fresh media:  
tube A = 8 mL minAaa media supplemented with 34 µg/mL chloramphenicol  
tube B = 8 mL minAaa media supplemented with 34 µg/mL chloramphenicol and 0.5% (w/v) glucose
5. Grow at 37°C and 250 rpm to  $OD_{600} = 0.2$
6. Induce (tube A only) using 5 mM arabinose (add 40 µL of the 1M arabinose stock) and grow the culture at 37°C and 250 rpm for 16 hr
7. Place 10 µL of 10 mM attractant (either aspartate or serine) on minAaa semisolid agar every 7 mm down the middle of the plate (total 13 spots as shown below) and then allow attractant to dry at 4°C for 16 hr.

### Day 4

8. After 16 hr culture, centrifuge the culture tubes at 3000xg and 25°C for 7 min, decant supernatant, and resuspend cells using 5 mL minAaa media supplemented with 34 µg/mL chloramphenicol (washing solution).

9. Centrifuge the tubes at 3000xg and 25°C for 5 min and decant supernatant. Resuspend cells again using 5 mL minAaa media supplemented with 34 µg/mL chloramphenicol (washing solution), and measure OD<sub>600</sub> of the resuspended cells. Dilute cells to an OD<sub>600</sub> of 0.2 and grow in minAaa media supplemented with 34 µg/mL chloramphenicol for additional 1 hr.
10. Place 10µL of culture 13.5, 20, and 27 mm from the center line of attractant (as shown below) and incubate at 30°C.

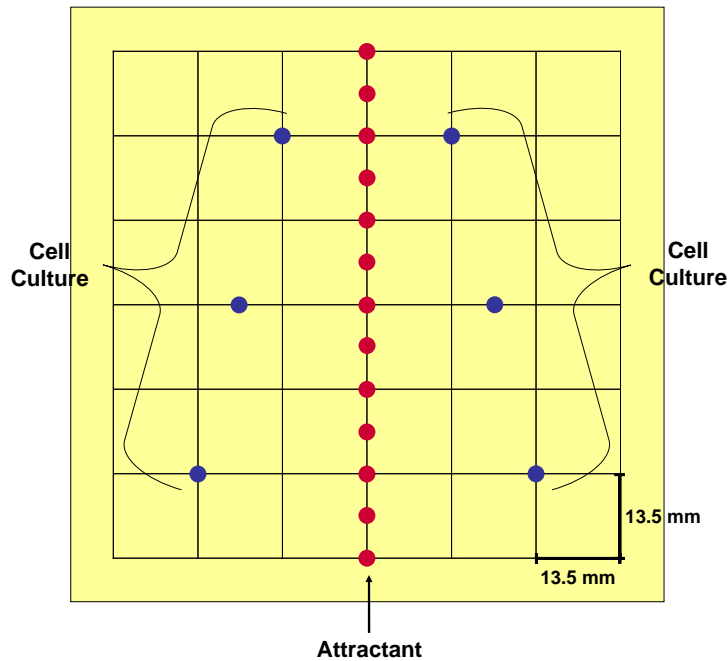

### Day 6

11. Take images after 48 hr incubation at 30°C.
  - Camera (AlphaImager®) setting:
    - Distance between lens and plate = 50 cm
    - Position and zoom adjustment = to put the spot position (the blue dot in the figure above) to the center of each image and to cover 27x27 mm<sup>2</sup>
    - Exposure time = 0.06-0.12 sec

### References

Derr P, Boder E, Goulian M (2006) Changing the specificity of a bacterial chemoreceptor. *Journal of molecular biology* **355**: 923-932.

### 2. Supplementary Figures

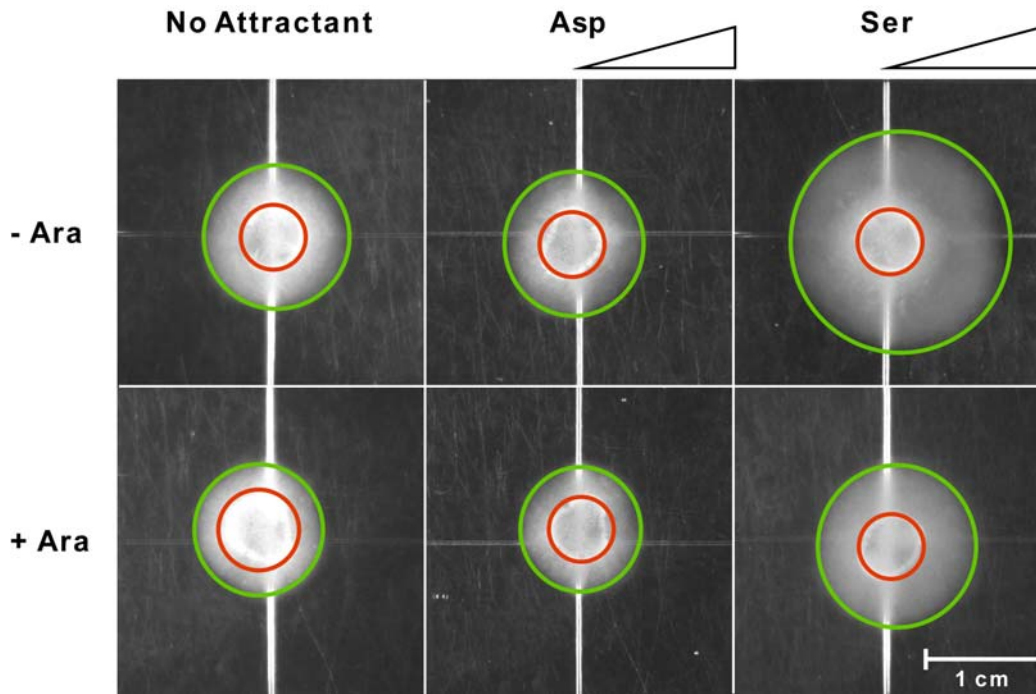

**Figure S1A.** Chemotaxis assay using the *cheW* deletion mutant. Images shown are representative of experiments that were performed at least three times (see Figure 4A).

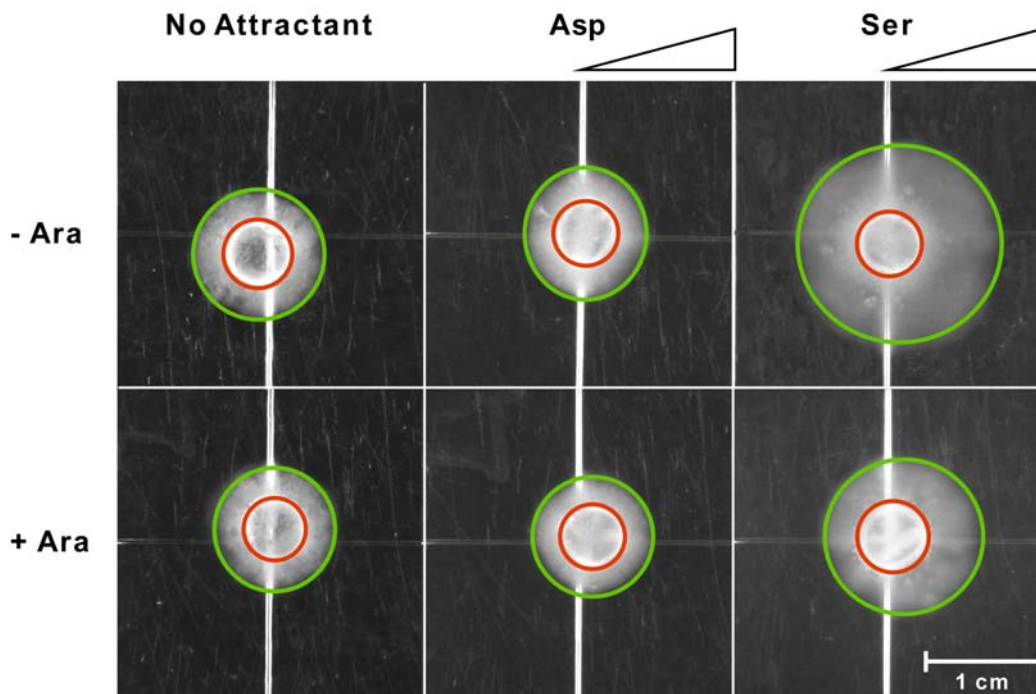

**Figure S1B.** Chemotaxis assay using the *tar* deletion mutant. Images shown are representative of experiments that were performed at least three times (see Figure 4B).

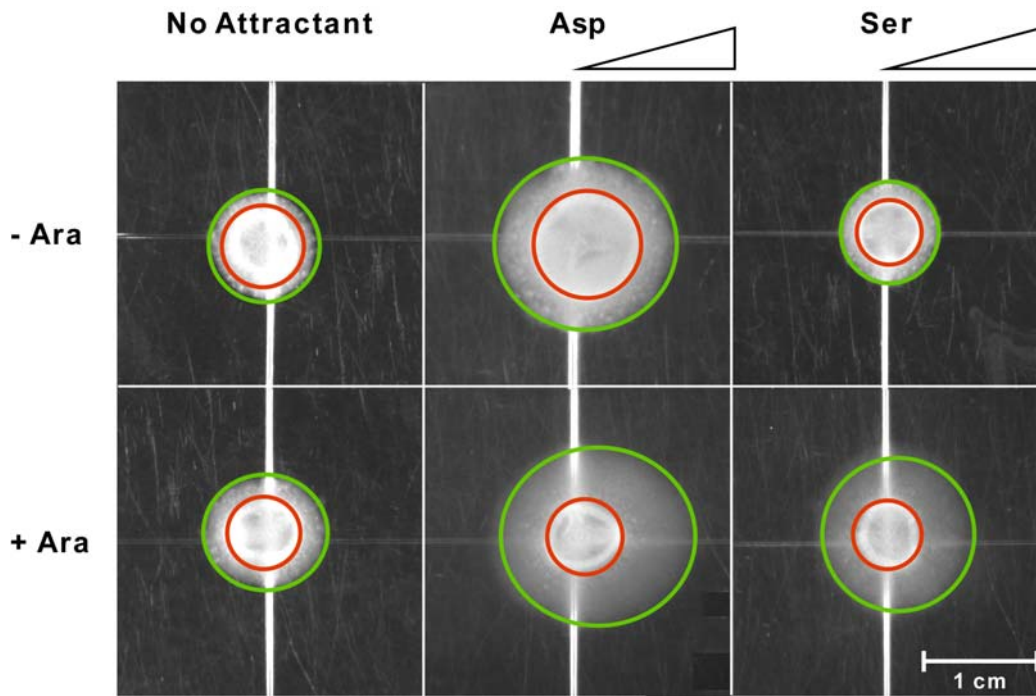

**Figure S1C.** Chemotaxis assay using the *cheW\** deletion mutant. Images shown are representative of experiments that were performed at least three times (see Figure 4C).

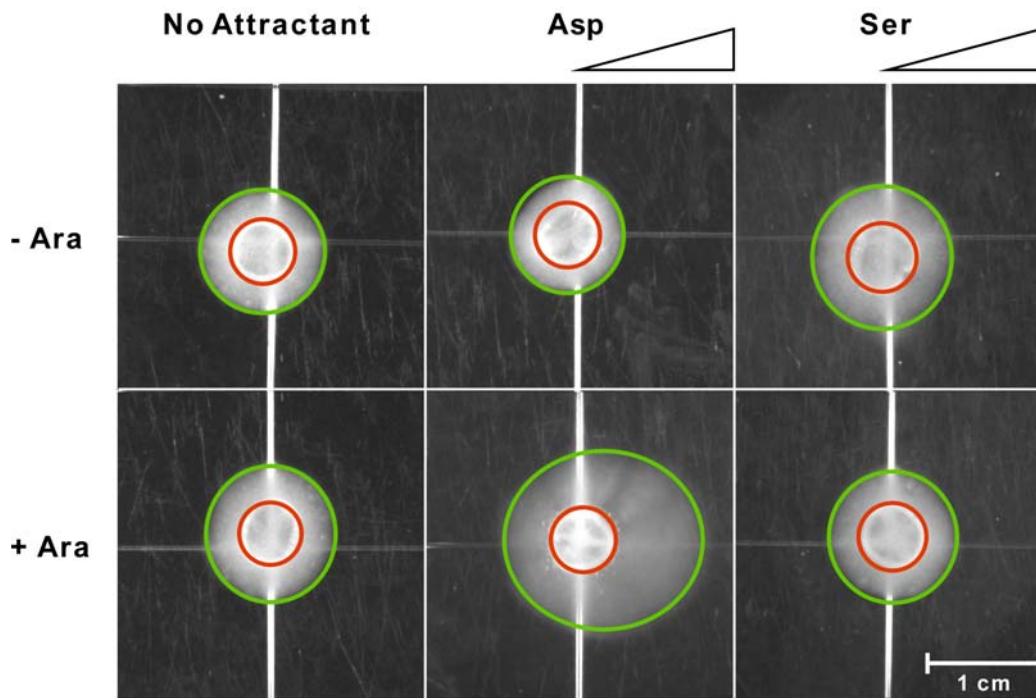

**Figure S1D.** Chemotaxis assay using the *tsr\** deletion mutant. Images shown are representative of experiments that were performed at least three times (see Figure 4D).

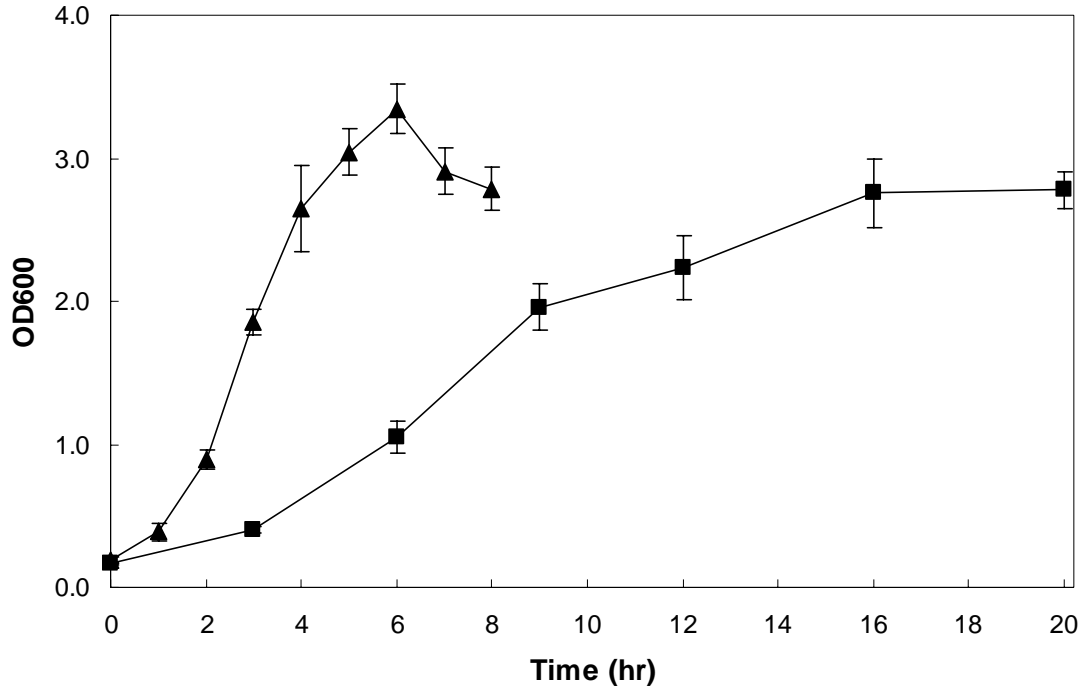

**Figure S2.** Growth curves for data presented in Figure 2C ( $\blacktriangle$  = LB, 5mM Ara) and 2F ( $\blacksquare$  = minAaa, 5mM Ara).

### 3. Image Analysis Algorithm (MATLAB Code)

```

clear all;
hold off;
imagefile = 'File_Name.png'; %-----Image file type should be png.
im = imread(imagefile);
%-----Image Processing Inner 0.7-----
%im = rgb2gray(im);
im = im2bw(im,0.7); %-----Change this parameter (by  $\pm 0.01$ ) until the algorithm fits the coordinates.
im = imfill(im,'holes');
RE = strel('disk',25);
im = imerode(im,RE);
im = imdilate(im,RE);
imshow(imagefile); hold on;
%-----Calculate Perimeter-----
found = 0;
for i = 1:size(im,1)
    for j = 1:size(im,2)
        if im(i,j) == 1 && found == 0
            initRow = i;

```



```

        initCol = j;
        found = 1;
    end
end
end
contour = bwtraceboundary(im, [initRow,initCol], 'N', 8, 2000);
x = contour(:,2);
y = contour(:,1);
x = x(1:end-1);
y = y(1:end-1);
clear i j perim contour;
%-----Ellipse Fitting-----
s = size(x);
xcen = sum(x) / size(x,1);
ycen = sum(y) / size(y,1);
t = zeros(size(x,1),1);
for b = 1:size(x,1)
    if (y(b)-ycen) > 0 && (x(b)-xcen) > 0
        t(b) = atan((y(b)-ycen)./(x(b)-xcen));
    elseif (y(b)-ycen) > 0 && (x(b)-xcen) <= 0
        t(b) = pi + atan((y(b)-ycen)./(x(b)-xcen));
    elseif (y(b)-ycen) <= 0 && (x(b)-xcen) <= 0
        t(b) = pi + atan((y(b)-ycen)./(x(b)-xcen));
    elseif (y(b)-ycen) <= 0 && (x(b)-xcen) > 0
        t(b) = (2*pi) + atan((y(b)-ycen)./(x(b)-xcen));
    end
end
W=[ones(s) zeros(s) cos(t);
    zeros(s) ones(s) sin(t) ] ;
af = W \ [x;y];
hold on
xnew = af(1) + af(3)*cos(t);
ynew = af(2) + af(3)*sin(t);
scatter(xnew, ynew , 'r')
clear RE W b s t x y xcen xnew ycen ynew im found initRow initCol
%-----Outer Circle-----
%-----
im = imread(imagefile);
%-----Image Processing outer 0.25-----
%im = rgb2gray(im);
im = im2bw(im,0.25);    %---- Change this parameter (by ±0.01) until the algorithm fits the coordinates.
im = imfill(im,'holes');
RE = strel('disk',25);
im = imerode(im,RE);
im = imdilate(im,RE);
%-----Calculate Perimeter-----
found = 0;
for i = 1:size(im,1)
    for j = 1:size(im,2)
        if im(i,j) == 1 && found == 0
            initRow = i;
            initCol = j;
            found = 1;
        end
    end
end
end
end

```

```

contour = bwtraceboundary(im, [initRow,initCol], 'N', 8, 2000);
x = contour(:,2);
y = contour(:,1);
x = x(1:end-1);
y = y(1:end-1);
clear i j perim contour;
%-----Ellipse Fitting-----
s = size(x);
xcen = sum(x) / size(x,1);
ycen = sum(y) / size(y,1);
t = zeros(size(x,1),1);
for b = 1:size(x,1)
    if (y(b)-ycen) > 0 && (x(b)-xcen) > 0
        t(b) = atan((y(b)-ycen)./(x(b)-xcen));
    elseif (y(b)-ycen) > 0 && (x(b)-xcen) <= 0
        t(b) = pi + atan((y(b)-ycen)./(x(b)-xcen));
    elseif (y(b)-ycen) <= 0 && (x(b)-xcen) <= 0
        t(b) = pi + atan((y(b)-ycen)./(x(b)-xcen));
    elseif (y(b)-ycen) <= 0 && (x(b)-xcen) > 0
        t(b) = (2*pi) + atan((y(b)-ycen)./(x(b)-xcen));
    end
end
W=[ones(s) cos(t) zeros(s) ;
    zeros(s) zeros(s) sin(t) ];
y = y - af(2);
bf = W \ [x;y];
xnew = bf(1) + bf(2)*cos(t);
ynew = af(2) + bf(3)*sin(t);
scatter(xnew, ynew, 'b')
hold off;
A = bf(2) - (bf(1) - af(1));
B = bf(2);
C = bf(3);
J = min([(A^2 / (B*C)) ((2*B - A)^2 / (B*C))]);
K = min([(A / (2*B - A)) ((2*B - A) / A)]);
clear RE W b imagefile s t x y xcen xnew ycen ynew im found initRow initCol
%-----Important Variables-----
% af(1) is inner circle's X center
% af(2) is inner circle's Y center
% af(3) is inner circle's radius
% bf(1) is outer ellipse's X center
% bf(2) is outer ellipse's X radius
% bf(3) is outer ellipse's Y radius
% Outer Ellipse's Y center is set to be the same as the Inner Circle's Y center
%-----

```

#### 4. Sequence Alignment

*tar* WT (1) ATGATTAAACCGTATCCGCGTAGTCACGCTGTTGGTAATGGTGCTGGGGGTATTTCGCACTGTTACAGCTTATTTCCGGCAG  
*tar* opt (1) ATGATCAATTCGTATTTCGTGTGGTTACTCTGCTGGTTCATGGTGTGGGGTGTTTTCGCGCTGCTGCAACTGATTAGCGGCAG  
*tar* WT (81) TCTGTTTTTTTCTTCCCTTCACCATAGCCAGAAAGAGCTTTGTGGTTTCCAATCAATTACGGGAACAGCAGGGCGAGCTGA  
*tar* opt (81) CCTGTTTTTTTCTTCCCTTCACCACAGCCAGAAATCTTTTCTGTTGTTAGCAATCAACTGCGTGAACAACAGGGTGAGCTGA  
*tar* WT (161) CGTCAACCTGGGATTTAATGCTGCAAACGCGCATTAACTGAGTCGTTACGCGGTACGGATGATGATGGATTCTCCAAT  
*tar* opt (161) CCAGCACCTGGGACCTGATGCTGCAAACGCGTATCAATCTGAGCCGTTCTGCCGTGCGTATGATGATGGACAGCAGCAAC  
*tar* WT (241) CAACAAAGTAACGCCAAAGTTGAATTGCTCGATAGCGCCAGGAAAACATTGGCGCAGGCAGCGACGCATTATAAAAAATT  
*tar* opt (241) CAACAAAGCAACGCCAAGGTTGAATTGCTGGACAGCGCTCGTAAGACGCTGGCCAGGCCGCAACCCACTACAAAAAGTT  
*tar* WT (321) CAAAAGCATGGCACCGTTACCTGAAATGGTTCGCTACCAGTCGTAATATTGATGAAAAATATAAAAACTATTACACAGCGT  
*tar* opt (321) TAAGAGCATGGCGCCTCTGCCGGAGATGGTTGCCACCAGCCGTAACATTGATGAAAAATACAAGAATTATTACACGGCAC  
*tar* WT (401) TAACTGAACTGATTGATTATCTAGATTATGGCAATACTGGAGCTTATTTTCGCTCAGCCAACCCAGGGAATGCAAAATGCA  
*tar* opt (401) TGACCGAGCTGATTGACTACTGGATTACGGTAATACGGGCGCCTACTTTCGCGCAGCCGACGCAAGGTATGCAGAACGCG  
*tar* WT (481) ATGGGCGAAGCGTTTGTCTCAGTACGCCCTCAGCAGTGAAAACTGTATCGCGATATCGTCACTGACAACGCAGATGATTA  
*tar* opt (481) ATGGGTGAGGCTTTTCGCGCAGTATGCGCTGAGCAGCGAGAAATTTGTACCGTGACATTGTTACCGATAACCGCGATGATTA  
*tar* WT (561) CCGATTTGCCCAGTGGCAAACCTGGCGTTATCGCGCTGGTGGTATTGATTCTGCTGGTGGCGTGGTACGGCATTCCGC  
*tar* opt (561) CCGTTTTGCGCAGTGGCAGCTGGCGGTTATCGCGCTGGTGGTGGTCTGATCTTGTGGTGGCCTGGTACGGTATTCCGTC  
*tar* WT (641) GTATGTTGCTTACTCCGCTGGCAAAAATTATTGCTCACATTTCGCGAAATCGCCGGTGGTAACCTGGCGAATACCCTGACC  
*tar* opt (641) GTATGCTGCTGACCCCGCTGGCAAAAGATTATTGCACACATCCGTGAGATCGCGGGTGGTAATCTGGCAAAACACCCTGACC  
*tar* WT (721) ATTGACGGGCGCAGTGAAATGGGCGACCTGGCGCAGAGCGTTTTCACATATGCAACGCTCTTTGACTGACACCGTCACTCA  
*tar* opt (721) ATTGACGGCCGTAGCGAGATGGGTGACCTGGCGCAAAGCGTCAGCCACATGCAACGTAGCCTGACCAGACACCGTCACGCA  
*tar* WT (801) TGTCCGCGAAGGTTTCAGATGCATCTATGCCGGTACCCGTGAAATTTGCGGCAGGCAACACCGATCTTTCTCCCGTACTG  
*tar* opt (801) CGTCCGCGAGGGTAGCGATGCAATCTACGCCGGCACCCGTGAAATTTGCGGCAGGTAACACCGACCTGAGCAGCCGTACTG  
*tar* WT (881) AACAGCAGGCATCCGCGCTGGAAGAAACTGCGCCAGCATGGAGCAGCTCACCGCGACAGTGAAGCAAAACGCGGATAAC  
*tar* opt (881) AGCAGCAGGCTTCCGCGCTGGAGGAAACCGCTGCCTCTATGGAACAACCTGACCGCGACGGTTAAACAAAACGCGAGACAAC  
*tar* WT (961) GCCCGCCAGGCCTCGCAACTGGCGCAAAGTGCCTCCGACACCGCCAGCAGCGCGGCAAAAGTGGTGGATGGCGTAGTGAA  
*tar* opt (961) GCACGTCAGGCATCCAGCTGGCGCAGAGCGCGTCTGACACCGCACAGCAGCGGTGGCAAGGTGGTTGACGGTGTGGTTAA  
*tar* WT (1041) AACGATGCATGAGATCGCCGATAGTTTCGAAGAAAATTGCCGACATTATCAGCGTTATCGACGGTATTGCCTTTCCAGACTA  
*tar* opt (1041) GACCATGCACGAGATTGCTGATAGCAGCAAAAAGATCGCCGACATCATTAGCGTGATTGACGGTATTGCCTTTCCAGACCA  
*tar* WT (1121) ATATCCTCGCGCTGAATGCGCGGTTGAAGCCGCGCGTGCAGGTTGAACAGGGCCGTTGGTTTTGCGCGTGGTGGCGGGTGAA  
*tar* opt (1121) ATATCCTGGCGTTGAATGCAAGCGGTGGAAGCGCACGTGCTGGCGAACAGGGCCGTTGGTTTTGCGAGTTGTGCGAGGCGAG  
*tar* WT (1201) GTGCGTAATCTTGCCAGTTCGACGCGCCAGGCGGCAAAAGAGATCAAAGCCCTCATTGAAGACTCCGTCTCACCGTGTGA  
*tar* opt (1201) GTTCGTAACCTGGCGAGCCGACGCGCAGGCGAGCAAGGAGATCAAAGCCCTCATTGAAGACTAGCGTTAGCCGTGTTGA  
*tar* WT (1281) TACCGTTTCGGTGTCTGGTTCGAAAGCGCCGGGAAACAATGAAACAATATCGTCAATGCGGTGACCCGCGTGACTGACATTA  
*tar* opt (1281) CACTGGCTCCGTGCTGGTGGAGTCCGCTGGTGGAGACTATGAATAACATCGTCAATGCGGTGACCCGCGTGACTGACATTA  
*tar* WT (1361) TGGGCGAGATTGCATCGGCATCGGATGAAACAGAGCCGTTGGCATCGATCAAGTCGCATTGGCGGTTTTCGGAAATGGATCGC  
*tar* opt (1361) TGGGCGAAATCGCGTCTGCTCTGATGAGCAAAGCCGTTGGCATCGATCAGGTCGCGCTGGCTGTCTCTGAGATGGACCGT  
*tar* WT (1441) GTCACGCAACAGAACGCATCGCTGGTGCAGGAATCAGCTGCGCGCCGCTGCGCTGGAAGAACAGGCGAGTCGTTTAAAC  
*tar* opt (1441) GTTACGCAGCAAAATGCGTCCCTGGTGCAGAAAGCGCGGCAAGCTGCGCGGCACTGGAGGAGCAAGCAAGCCGTCTGAC  
*tar* WT (1521) GCAAGCAGTTTCCGCGTTCCGTCTGGCAGCCAGCCACTCACCAATAAACCGCAAAACCCATCCCGTCCCTGCCAGTGGAGC  
*tar* opt (1521) CCAAGCAGTGTCCGCGTTCCGCTGGCCGCAAGCCCGTTGACCAATAAGCCGCGAGCAGCAAGCCGCTGCGAGCGAGC  
*tar* WT (1601) AACCACCGGCTCAGCCAGACTGCGAATTGCTGAACAAGATCCAAACTGGGAAACATTTTGA  
*tar* opt (1601) AGCCGCCAGCCAACTCGTCTGCGTATTGCGGAGCAAGATCCGAACTGGGAAACCTTCTAA

**Figure S2A.** Sequences of wild type *tar* (WT) and codon-optimized *tar* (opt). The codon-optimized gene was synthesized and used in this work.

*tsr* WT (1) ATGTTAAAACGTATCAAAATTGTGACCAGCTTACTGCTGGTTTGGCCGTTTTGGCCTTTTCAAACTGACATCAGGCGG  
*tsr\** opt (1) ATGCTGAAGCGTATCAAAATTGTTACTTCCCTGCTGCTGGTTCTGGCCGTTTGGCCTGCTGCAAACTGACTTCCGGTGG  
*tsr* WT (81) TCTGTTCTTTAATGCTTAAAGAATGACAAAGAAAATTTCACTGTTTTACAAACCATTCGCCAGCAGCAATCCACGCTGA  
*tsr\** opt (81) TCTGTTCTTTAATGCTTCTGAAAATGATAAAGAAAATTTACTGTACTGCAAACGATCCGCCAGCAGCAGTCTACTTCTGA  
*tsr* WT (161) ATGGCAGCTGGGTGCGCTTGTGTCAGACGCGTAAACCCTCAACCAGCGGGTATCCGCTACATGATGGATCAGAATAAT  
*tsr\** opt (161) ACGGTTCTGGGTGCGCTGCTGCAAACCCGTAATACCCTGAACCAGCGCAGGCATTTCGTTACATGATGGACCAGAACAAC  
*tsr* WT (241) ATTGGTAGCGGTTCAACCGTTGCTGAGCTGATGGAGAGTGCAGTATTTTCGCTGAAACAGGCGGAAAAAACTGGGCGGA  
*tsr\** opt (241) ATCGGCTCCGGCTCTACCGTCTGCTGAACTGATGGAATCCGCGTCCATCTCTCTGAAACAAGCTGAGAAGAACTGGGCGGA  
*tsr* WT (321) TTACGAAGCGTTGCCGCGTGACCCGCGTCAGAGCACCCGCCAGCGGCAGAGATCAAACGTAATTACGATATTTATCACA  
*tsr\** opt (321) TTACGAGGCTCTGCCGCGTGATCCTCGCCAGTCTACTGCCGCTGCTGCCGAAATCAAACGTAATACGACATCTACCATA  
*tsr* WT (401) ATGCGCTGGCGGAGCTGATCCAACGTTAGGTGCAGGCAAAATCAACGAGTTCTTTGATCAGCCGACCCAGGGATATCAG  
*tsr\** opt (401) ACGCGCTGGCCGAACTGATTCAACTGCTGGGTGCTGGCAAAATTAACGAGTTCTTTGACCAGCCGACCCAGGGCTATCAG  
*tsr* WT (481) GACGGTTTCGAGAAGCAGTATGTGGCTTACATGGAGCAAACGATCGGCTCCATGATATCGCCGTCAGCGATAACAATGC  
*tsr\** opt (481) GACGGTTTCGAAAAACAGTACGTTGCGTATATGGAGCAGAACGACCGTCTGCACGACATCGCTGTCTCCGATAACAACGC  
*tsr* WT (561) CTCCTACAGCCAGGCGATGTGGATTCTGGTGGCGTGATGATCGTCTGTAAGCGGTCATCTTCGCCGCTGTGGTTCCGTA  
*tsr\** opt (561) TTCCTACTCTCAGGCAATGTGGATTCTGGTGGTGTATGATTGTTGTTCTGGCGGTCATCTTCGCTGTGTTGGTTTGGTA  
*tsr* WT (641) TTAAAGCCTCGCTGGTAGCGCCAAATGAATCGCCTGATTGACAGCATTTCGTCAATATTGCAGGCGGCGATCTGGTGAACCG  
*tsr\** opt (641) TTAAAGCCAGCCTGGTAGCTCCGATGAATCGTCTGATCGATAGCATCCGTCACATTGCGGGCGGTGATCTGGTAAAGCCG  
*tsr* WT (721) ATTGAGGTGGATGGCTCTAATGAGATGGGGCAACTGGCAGAGAGTTTGGCGCATATGCAGGGAGAGCTGATGCGTACCCT  
*tsr\** opt (721) ATCGAAGTGGACGGCTCCAACGAAATGGGTCAACTGGCAGAAATCTCTGCGTCAATGCAGGGCGAGCTGATGCGCACTGT  
*tsr* WT (801) CGGTGATGTGCGCAACGGGGCAATGCCATCTATAGCGGTGCAGCGAAATCGCCACCAGCAATAACGATCTCTCTTCGC  
*tsr\** opt (801) TGGTGATGTTGTAACGGTGCAAATGCTATTTACTCCGGTGCATCCGAGATTGCAACCGGTAAACAACGACCTGTCTCTC  
*tsr* WT (881) GCACCGAGCAACAGGCCGCTTCGCTGGAAGAGACGGCAGCCAGCATGGAGCAACTGACCGCAACGGTGAAGCAGAACGCC  
*tsr\** opt (881) GTACTGAGCAGCAGGCTGCCTCCCTGGAAGAGACTGCGGCAAGCATGGAGCAACTGACTGCTACCCTTAAACAGAATGCG  
*tsr* WT (961) GAAAATGCGCGCCAGGCCAGCCATCTGGCGTTAAGTGCTTCTGAAACGGCGCAACCGCGCGGTAAAGTGGTAGATAACGT  
*tsr\** opt (961) GAAAACGCACGTACAGGCATCCACCTGGCGCTGTCCGCTTCTGAAACCGCACAGCGTGGTGGCAAAGTTGTAGATAACGT  
*tsr* WT (1041) GGTGCAGACTATGCGCGATATCTCCACCAGTTCGCAGAAAATCGCCGATATTATCAGCGTAATTGACGGCATTGCCTTCC  
*tsr\** opt (1041) AGTGCAGACGATGCGCGATATTTCTACCTCTAGCCAGAAATCGCAGACATCATCAGCGTCATTGACGGTATCGCGTTTC  
*tsr* WT (1121) AGACCAATATTCTGGCTTTGAACGCGGGCGTTGAGGCTGCGCGTGCAGGGTGAAGCAAGGGCGCGGTTTTGCGGTGGTTCGG  
*tsr\** opt (1121) AGACCAACATCTGGCGCTGAACGCAGCCGTTGAGGCAAGTTCGTCGCGGGCGAAACAAGGCCGTGGCTTCGCGGTGGTTCGCT  
*tsr* WT (1201) GGAGAAGTGCCTAATCTGGCCAGCAGCAGCGCCAGGCGGCTCGTGAATTTAAAAGCCTGATTGAAGACTCGGTGGGGAA  
*tsr\** opt (1201) GGCAGTGCCTAACCTGGCACAGCCTTCTGCCAGGCGGCAAGTGCAGTCCCTGATTGAAGACTCTGTGGGCAA  
*tsr* WT (1281) AGTGGATGTTGGCTCTACGCTGGTGAAGAGCGCGGGGAAACAAATGGCGGAGATTGTGAGCGCGCTGACCCGCTGACCG  
*tsr\** opt (1281) AGTTGACGTGGGTTCTACCTGGTAGAGAGCGCGGTTGAAACGATGGCTGAAATTGTTCCGCGGTAACCCGTGTGACCG  
*tsr* WT (1361) ACATTATGGGCGAAATGCTTCTGCTTCTGATGAGCAGAGCCGTTGATCAGATCAGGTTGGCTTAGCGGTTGCTGAGATG  
*tsr\** opt (1361) ACATCATGGGTGAGATCGCATCCGCTTCCGACGAGCAGTCCCGTGGTATCAGATCAGGTTGGCCTGGCGGTAGCTGAAATG  
*tsr* WT (1441) GACCGGGTAACCTCAACAGAACGCCGCGCTGGTGAAGAGTCTGCGCTGCGCGCGCTGGAAGAGCAGGCCAGTTCG  
*tsr\** opt (1441) GACCGTGTACCAGCAAAACGCCGCCCTGGTGAAGAGTCTGCTGCGGCAAGCGGCTGCACTGGAAGAACAGGCCAAGCCG  
*tsr* WT (1521) CCTGACCGAAGCAGTGGCAGTGTTCGGATTTCAGCAACAGCAGCGTGAACATCGGCTGTGGTAAAAACCGTGACGCCAG  
*tsr\** opt (1521) TCTGACCGAAGCGGTAGCAGTGTTCGGTATTTCAGCAGCAGCAGCGTGAACATCTGCGTGTGGTAAAAACCGTGACCCGG  
*tsr* WT (1601) CTGCGCCGCGTAAAATGGCCGTGGCAGATAGCGAGGAGAAGTGGGAAACATTTTAA  
*tsr\** opt (1601) CAGCTCCGCGCAAAATGGCAGTTGCAGATTCGGAAGAGAAGTGGGAAACCTTCTAA

**Figure S2B.** Sequences of wild type *tsr* (WT) and codon-optimized *tsr\** (opt). The codon-optimized gene was synthesized and used in this work.

*cheW* WT (1) ATGACC**CGGT**TATGACGAATGT**AACA**AAAGCTGGC**CAGCGAGCCGTC**AGGCCAGGAATTTCTGGT**ATTTAC**CCTTGGT**GATGA**  
*cheW* opt (1) ATGACTGG**C**ATGACGAATGT**TACG**AAATTGGC**AAGCGAACCA**TC**TGGT**CAGGAATTTCTGGT**TTT**CACGTTGGG**C**GACGA  
*cheW* WT (81) **AGAGT**ACGGTATT**TGAT**TATCCTGAAAGT**GCAGGAGAT**CCGTGG**CTACGAT**CAGGT**AACACGGATT**GCGAACACGCC**AGCGT**  
*cheW* opt (81) **GGAAT**ACGGTAT**CGAC**ATCCTGAAAGT**TCAGGAAAT**CCGTGG**TTATGACC**AGGT**TACGCGC**ATTGCGAATACGCC**GGCTT**  
*cheW* WT (161) TTATCAA**AGGCGT****CACGA**ATCTGCGCGGC**GT**TATTGTGCCGATTGTTGACT**TACGA**ATTAAGTT**CAGCC**AGGTGGAT**GTG**  
*cheW* opt (161) TTATCA**AGGGT**GT**TACCA**ATCTGCGCGGC**GT**CATTGTGCCGATTGTTGACT**TGCGC**ATTAAGTT**TTCT**CAAGTT**GAC**GTG  
*cheW* WT (241) GACTATAACGACA**ACACGGT****AGTT**TATCGT**CCTGAATCTCGG**ACAGCGGGTGGT**CGGC**ATCGTGGTTGACGG**CGTCTC**AGA  
*cheW* opt (241) GACTATAACGACA**ATACGGT****CGTT**ATTGT**CCTGAATTTGGG**CCAGCGCGTGGT**TGGC**ATCGT**TGTT**GATGGT**GT**CAGCGA  
*cheW* WT (321) CGTGCT**TT**CATTGACGGCGGAGCAA**ATTCGT**CCGGCACC**GGAAATTTGCC**GTGAC**GC**TTT**CAAC**AGAATATCT**CACT**GGAC  
*cheW* opt (321) CGTGCT**GAGCC**TGAC**CGCGG**AGCAA**ATTCGT**CCGGCACC**GGAAATTTGCC**GT**TAC**CCT**GAGC**AC**GGA**ATATCT**GAC**GGGT**C**  
*cheW* WT (401) TGGG**CGC**ACTGGG**CGACCG**GATG**TTG**ATTCTGGTGAACATCGA**AAAACT**GCTGAACAGCGAAGAGATGGCG**CTGTT**AGAT  
*cheW* opt (401) TGGG**TGC**CCTGGG**TGACCG**TATG**CTG**ATTCTGGTGAACATCGA**GAAACT**GCTGAACAGCGAAGAGATGGCG**TTGCT**GGAT  
*cheW* WT (481) AGCGCGG**CGT**CAGAAGTGGCGTAA  
*cheW* opt (481) AGCGCAGC**CAGC**GAGGTTGCATAA

**Figure S2C.** Sequences of wild type *cheW* (WT) and codon-optimized *cheW* (opt). The codon-optimized gene was synthesized and used in this work.

*cheW* WT (1) ATGACC**GGT**TATGAC**GAAT**GTAA**CA**AAAGCTGGC**CAGCGAGCCGTC**AGGCCAGGAATTTCTGGT**ATTTAC**CCTTGGT**GATGA**  
*cheW\** opt (1) ATGACC**GGT**TATGAC**TAAC**GTAA**CT**GGC**TTCT**GAGCCGT**CCGG**CCAGGAGTT**CCT**GGT**TTT**CACCCTGGG**C**GATGA  
*cheW* WT (81) **AGAGT**ACGGTATT**TGAT**TAT**CCT**GAAAGT**GCAGGAGAT**CCGTGG**CTACGAT**CAGGT**AACACGGATT**GCGAACACGCC**AGCGT**  
*cheW\** opt (81) **AGAAT**ACGGTATT**TGAC**AT**TCT**GAAAGT**ACAGGAAAT**TCGTGG**TTACGACC**AGGT**CACT**CGTAT**CGT**AAAC**CCCG**GGCTT  
*cheW* WT (161) **T**TATCAA**AGGCGT****CACGA**ATCTGCGCGGC**GT**TATT**TGT**GCCGATTGTTGACT**TACGA**ATTAAGTT**CAGCC**AGGTGGAT**GTG**  
*cheW\** opt (161) **T**CATCAA**AGGT**GT**TAAC**CA**ACT**GCGCGGT**GT**TATCGT**TCCA**ATTGT**AGACCT**GCGTATCAA**ATT**AGCCAGGTGGAC**GT**  
*cheW* WT (241) GACTATA**ACG**ACA**ACACGGT****AGTT**TATCGT**CCTGAATCTCGG**ACAGCGGGTGGT**CGGC**ATCGTGGTTGACGG**CGTCTC**AGA  
*cheW\** opt (241) G**ATT**ACA**ATG**ATA**AACT**GT**GGT**GATCGT**TT**TGA**ACT**GGG**TCA**ACGT**TT**GT**GGC**ATCGTGGTTGACGGT**GT**GAGCGA  
*cheW* WT (321) CGTGCT**TT**CATTGACGGCGGAGCAA**ATTCGT**CCGGCACC**GGAAATTTGCC**GTGAC**GC**TTT**CAAC**AGAATATCT**CACT**GGAC  
*cheW\** opt (321) **C**ATGCT**GT**CCTGAC**CGCC**GAGCAGAT**CCGT**CCGGCACC**GGAGTT**CGCAGT**CACGCT**GAGCACC**GAA**TACCTGACTGGCC  
*cheW* WT (401) TGGG**CGC**ACTGGG**CGACCG**GATG**TTG**ATTCTGGTGAACATCGA**AAAACT**GCTGAACAGCGAAGAGATGGCG**CTGTT**AGAT  
*cheW\** opt (401) TGGG**TGC**TCTGGG**TGACCG**TATG**CTG**AT**CCT**GGT**AA**ACATCGA**GAAACT**GCTGAATAGCGAAG**AAAT**GGC**ACT**GCTGGAC  
*cheW* WT (481) **AGCGCGGCGT**CAGAAGTGGCGTAA  
*cheW\** opt (481) **TCT**G**CAGC**CT**T**G**AA**GT**AG**CGTAA

**Figure S2D.** Sequences of wild type *cheW* (WT) and codon-optimized *cheW\** (opt). The codon-optimized gene was synthesized and used in this work.
